# Supplementary material
Source: Elsevier journal article supplement (https://comptes-rendus.academie-sciences.fr/chimie/article/10.1016/j.crci.2008.04.002/file/attach/mmc1.pdf)

**Figure a (extended figure 1):**  $^{31}\text{P}$ - $\{^1\text{H}\}$  NMR spectra (in  $\text{CD}_2\text{Cl}_2$ ) of  $[\text{Fe}_2(\text{CO})_4(\kappa^2\text{-dmpe})\{\mu\text{-pdt}\}]$  (**1**) at 174 and 298 K.

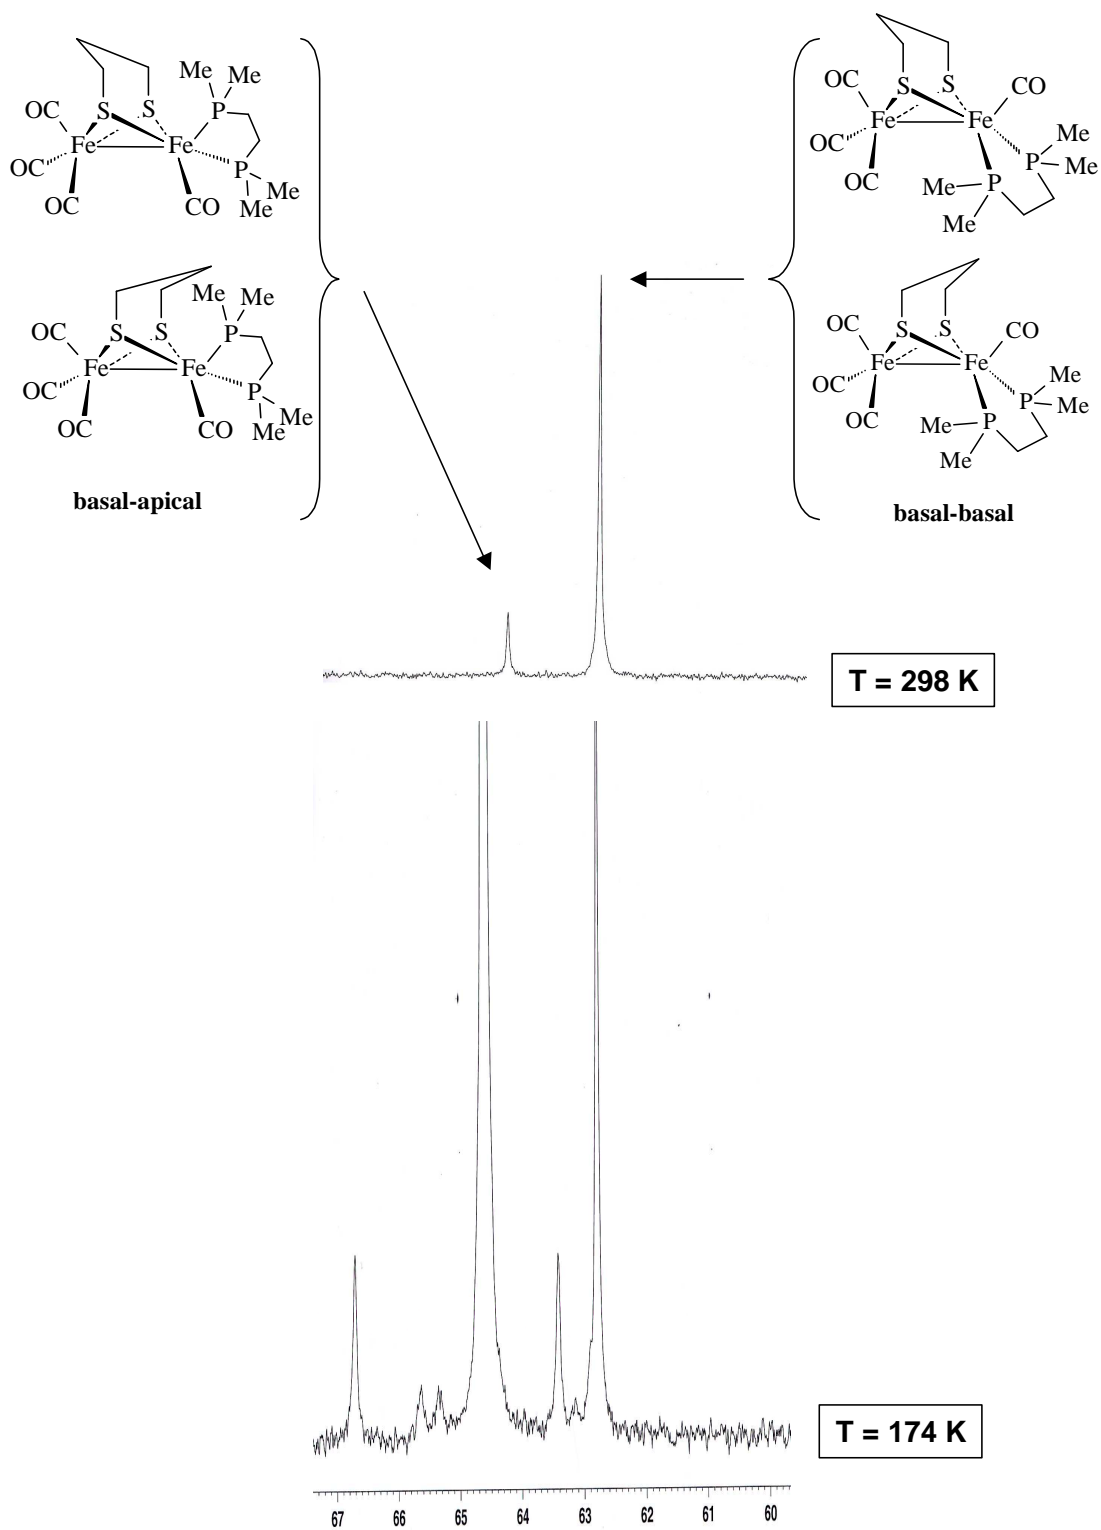

**Figure b:**  $^{13}\text{C}\{-^1\text{H}\}$  NMR spectrum of **3** in the carbonyl region

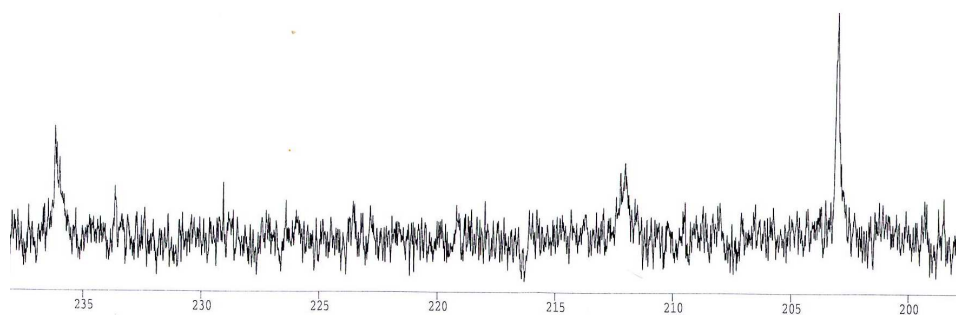

**Figure c:**  $^1\text{H}\text{-}^{13}\text{C}$  HMBC 2D NMR spectrum of **3** (hydride region)

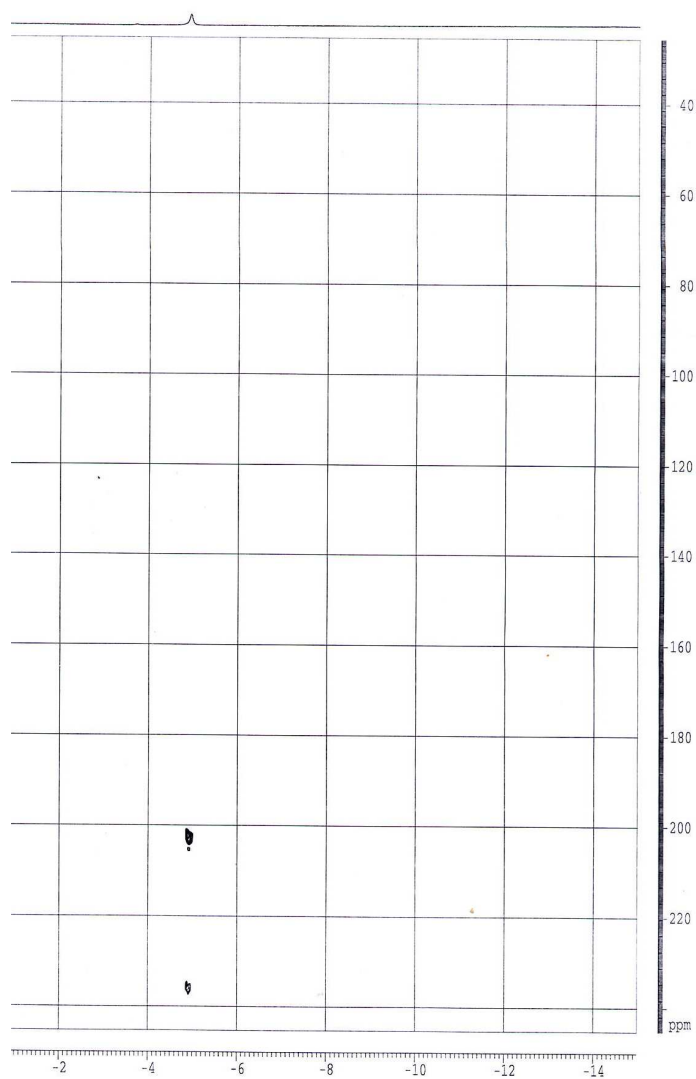

**Figure d:** Protonation of the symmetrical complex  $[\text{Fe}_2(\text{CO})_4\{\text{P}(\text{OMe}_3)\}_2(\mu\text{-pdt})]$

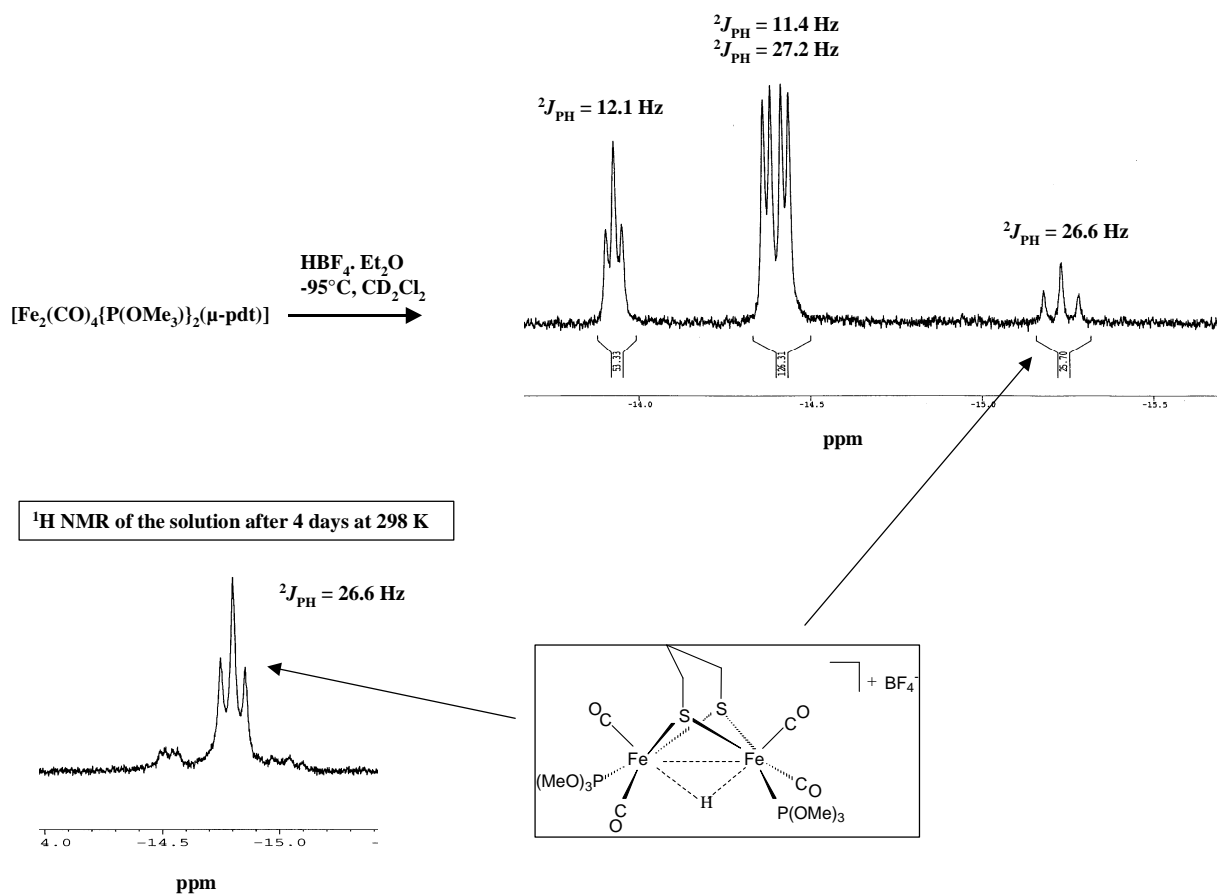

Supplement: mmc1 [file mmc1.pdf]
